# Supplementary material
Source: publisher figshare collection journal article supplement (https://geolsoc.figshare.com/ndownloader/files/5427320)
Supplement: Supplementary file 1 [file 5427320]

Sample No;Lok65_7r*;Lok65_7c*;Lok65_8r*;Lok65_8c*;14_2_1g.r*;14_2_1g.c*;14_2_1_14g.r*;14_2_1_14g.c*;14_2_1_25;14_2_1_27;14_2_2_15;14_2_2_17
SiO2;59.36;57.25;59.109;54.61;56.236;56.59;56.863;56.211;55.187;56.89;58.811;56.83
Al2O3;24.096;25.883;25.649;27.374;26.381;26.139;25.47;25.658;26.194;25.378;24.101;26.269
Fe2O3 T�;0.702;0.342;0.569;0.02;0.159;0.19;0.344;0.247;0.272;0.255;0.31;0.383
CaO;6.773;8.355;6.682;9.773;9.351;9.006;8.84;8.638;9.63;8.725;8.254;8.499
Na2O;7.525;6.154;6.873;5.086;6.07;5.975;6.121;6.692;5.974;6.601;4.848;6.394
K2O;0.601;0.546;0.396;0.36;0.402;0.426;0.485;0.402;0.388;0.308;0.576;0.426
TiO2;0.283;0.001;0.001;0.001;0.001;0.037;0.009;0;0.03;0.001;0.009;0
MgO;0.001;0.001;0.001;0.001;0.012;0.005;0.034;0.012;0.03;0.027;0.032;0.046
BaO;na�;na;na;na;0;0.051;0.069;0.073;0.036;0;0.041;0
Cl;na;na;na;na;0.094;0.088;0.116;0.449;0.339;0.485;0.56;0.23
P;na;na;na;na;0.206;0.228;0.19;0.056;0.049;0.041;0.036;0.101
Total;99.34;98.532;99.28;97.225;98.911;98.735;98.54;98.437;98.127;98.711;97.576;99.179
Cations;;;;;;;;;;;;
Si4+;2.679;2.599;2.655;2.522;2.565;2.582;2.602;2.584;2.547;2.603;2.718;2.582
Al3+;1.282;1.385;1.358;1.49;1.418;1.406;1.374;1.39;1.425;1.368;1.262;1.407
Fe2+;0.026;0.013;0.021;0.001;0.006;0.007;0.013;0.009;0.011;0.01;0.007;0.015
Ti4+;0.01;0.01;0;0;0;0.001;0;0;0.001;0;0.001;0
Mg2+;0;0.013;0;0;0.001;0;0.002;0.001;0.002;0.002;0;0.03
(Si	Al	Fe	Ti	Mg);3.997;4.019;4.034;4.013;3.99;3.996;3.991;3.984;3.986;3.983;3.988;4.034
Ca2+;0.327;0.406;0.322;0.483;0.457;0.44;0.433;0.425;0.476;0.428;0.314;0.414
Na+;0.659;0.542;0.599;0.455;0.537;0.529;0.543;0.597;0.535;0.586;0.67;0.563
K+;0.035;0.032;0.023;0.021;0.023;0.025;0.028;0.024;0.023;0.018;0.021;0.025
(Ca	Na	K);1.021;0.98;0.944;0.959;1.017;0.994;1.004;1.046;1.034;1.032;1.005;1.002
An;32;41.4;34.1;50.4;44.9;44.3;43.1;40.6;46;41.5;31.2;41.3
Ab;64.5;55.3;63.5;47.4;52.8;53.2;54.1;57.1;51.7;56.8;66.7;56.2
Or;3.4;3.3;2.4;2.2;2.3;2.5;2.8;2.3;2.2;1.7;2.1;2.5
